# Supplementary material for: Looking glass inhibitors:l-DMDP, a more potent and specific inhibitor of α-glucosidases than the enantiomeric natural product DMDP
Source: Royal Society of Chemistry journal article supplement (doi:10.1039/b406035k), 2004-01-01
Supplement: b406035k.doc [file b406035k.doc]

# # Supplementary Material (ESI) for Chemical Communications

# # This journal is © The Royal Society of Chemistry 2004

# SUPPLEMENTARY DATA Experimental

Tetrahydrofuran was distilled under an atmosphere of dry nitrogen from sodium benzophenone ketyl or purchased dry from the Aldrich Chemical Company in Sure/Seal bottles; dichloromethane or acetonitrile was distilled from calcium hydride; pyridine was distilled from calcium hydride and stored over dried 3 Å molecular sieves; hexane refers to 60-80˚C petroleum ether; water was distilled. *N*,*N*-Dimethylformamide was purchased dry from the Aldrich Chemical Company in Sure/Seal bottles. All other solvents were used as supplied (analytical or HPLC grade) without prior purification. Reactions performed under an atmosphere of nitrogen or hydrogen gas were maintained by an inflated balloon. pH 7 Buffer was prepared by dissolving KH2PO4 (85 g) and NaOH (14.5 g) in distilled water (950 ml). All other reagents were used as supplied, without prior purification.Thin layer chromatography (t.l.c.) was performed on aluminium or plastic sheets coated with 60 F254 silica. Products were visualised using a spray of 0.2% w/v cerium (IV) sulphate and 5% ammonium molybdate in 2M sulphuric acid or 0.5% ninhydrin in methanol (particularly for amines). Flash column chromatography was performed on Sorbsil C60 40/60 silica, acidic ion-exchange chromatography was performed on Dowex 508-400 (H+). Melting points were recorded on a Köfler hot block and are corrected. Nuclear magnetic resonance (NMR) spectra were recorded on a Bruker AM 500 or AMX 500 (1H: 500 MHz and 13C: 125.3 MHz) or where stated on a Bruker AC 200 (1H: 200 MHz and 13C: 50.3 MHz) or Bruker DPX 400 (1H: 400 MHz and 13C: 100.6 MHz) spectrometer in deuterated solvent. Chemical shifts () are quoted in ppm and coupling constants (J) in Hz. Residual signals from the solvents were used as an internal reference and 13C NMR spectra in D2O were referenced to 1,4-dioxane (C 67.4). 13C multiplicities were assigned using a DEPT sequence. Infrared spectra were recorded on a Perkin-Elmer 1750 IR Fourier Transform, or Perkin-Elmer Paragon 1000 spectrophotometer using thin films on NaCl plates (thin film). Only the characteristic peaks are quoted. Low resolution mass spectra (*m/z*) were recorded on VG MassLab 20-250, Micromass BIOQ-II, Micromass Platform 1, Micromass TofSpec 2E, or Micromass Autospec 500 OAT spectrometers and high resolution mass spectra (HRMS *m/z*) on a Micromass Autospec 500 OAT spectrometer. Techniques used were electrospray (ES), matrix assisted laser desorption ionisation (MALDI), chemical ionisation (CI, NH3), or atmospheric pressure chemical ionisation (APCI) using partial purification by HPLC with 40 : 40 : 20 methanol : acetonitrile : water as eluent, as stated.Optical rotations were recorded on a Perkin-Elmer 241 polarimeter with a path length of 1 dm. Concentrations are quoted in g/100 ml.

5,6-*O*-Isopropylidene-D-gulono-1,4-lactone **3**

This compound was prepared as described for the synthesis of its enantiomer. 2-Methoxy propene (3.62 ml, 36.7 mmol) was added dropwise through a syringe to a solution of D-gulono-1,4-lactone (5.45 g, 36.6 mmol) and p-TSA (50 mg, catalytic) in DMF (20 ml) at 0C (ice-bath) under nitrogen. After 20h., TLC (AcOEt) indicated the complete conversion of the starting material (R­f = 0.00) to a major product (Rf = 0.38). The reaction solution was neutralised by sodium bicarbonate (2.5 g), filtered through celite and evaporated. The residue was recrystallised (AcOEt-MeCN), affording the kinetic monoacetonide **3**, white crystals (6.86 g, 86%). m.p. 168-170C (AcOEt-MeCN). []D22 = -38.0 (c=1.0, MeOH). {Lit.42: m.p. 165-167C (Acetone-petroleum). Lit.43 *ent*-**1**: m.p. 167-168C (AcOEt). []D22 = +38.3 (c=0.7, MeOH)}. 1H-NMR (200 MHz, DMSO-d6):  1.31, 1.34, (2s, 23H, CMe2), 3.76 (dd, *J* 6.8, *J* 8.3 1H,), 4.07 (dd, *J* 2.5, *J* 8.4, 1H), 4.20-4.37 (m, 3H), 4.42 (dd, 1H, *J* 4.6, *J* 7.4), 5.47 (d, 2H, *J* 7.4, OH), 5.89 (d, 2H, *J* 4.1, OH) ppm. 13C-NMR (50.3 MHz, DMSO-d6):  26.1, 27.4 (Me2C), 65.2 (C-6), 70.0, 70.1 (C-2, C-3), 75.9 (C-5), 82.1 (C-4), 109.8 (Me2C), 176.8 (C-1) ppm.

2-Azido-2-deoxy-5,6-*O*-isopropylidene-D-idono-1,4-lactone **4**

Triflic anhydride (1.34 ml, 8 mmol) was added dropwise through a syringe to a solution of the diol **3** (1.60 g, 7.34 mmol) in pyridine (3 ml) and DCM (20 ml) at -40C under nitrogen. After 3h., TLC (AcOEt-Petroleum ether, 1:1) indicated the complete conversion of the starting material (Rf = 0.01) to a major product (Rf = 0.64). Solvents were evaporated under vacuum; the residue was dried and dissolved in DMF (15 ml). NaN3 (1.92 g, 29.5 mmol) was added to the unpurified triflate solution in DMF (15 ml) and stirred at r.t. under nitrogen for 26h. TLC (AcOEt-Petroleum ether, 1:1) indicated the formation of a major product (Rf = 0.40). The solution was concentrated by co-evaporating with toluene under vacuum . The resultant residue was dissolved in AcOEt and washed with water . The aqueous solution was extracted with AcOEt and the combined AcOEt solution was dried (MgSO4), filtered and evaporated. The resulting residue was purified by flash column chromatography (silica gel, AcOEt-petroleum ether, 1:3), to give the idono-azide 5, (1.32 g, 74%). m.p. 70-72C (AcOEt-petroleum ether). []D22 = -198.2 (c=1.15, CHCl3). {Lit.44 *ent-***2**: m.p. 69-70C (AcOEt-hexane). []D21 = +165.6 (c=0.7, CHCl3)}. MS (APCI+): *m/z* 214 ([M-N2+H)]+, 100%). IR (KBr): 3400 (OH), 2119 (N3), 1770 (C=O, lactone) cm-1. 1H-NMR (500 MHz, DMSO-d6):  1.28, 1.29, (2s, 23H, CMe2), 3.75 (dd, 1H, *J*6a,5 7.1, *J*6a,6b 8.4, H-6a), 4.08 (dd, 1H, *J*6b,5 7.6, *J*6b,6a 8.4, H-6b ), 4.40-4.43 (m, 2H, H-3, H-5), 4.53 (dd, 1H, *J* 3.1, *J* 7.3, H-4), 4.66 (d, 1H, *J*2,3 9.0, H-2), 6.36 (d, 1H, *J*OH,3 4.8, OH) ppm. 13C-NMR (125.7 MHz, DMSO-d6):  26.1, 26.4 (Me2C), 63.3 (C-2), 65.9 (C-6), 72.1 (C-3), 73.3 (C-5), 79.3 (C-4), 109.9 (Me2C), 172.5 (C-1) ppm. Found : C, 44.38; H, 5.35; N, 17.25%; C9H13N3O5 requires C, 44.68; H, 5.16; N, 17.08%.

2-Azido-2-deoxy-5,6-*O*-isopropylidene-D-gulono-1,4-lactone **5**

PPTS, (2.10 g, 8.3 mmol) was added to a solution of the *idono*-azide **4** (2 0 g, 8.2 mmol) in DMF (20 ml) at r.t. and the reaction mixture was stirred under nitrogen for 7 days. TLC (AcOEt-Petroleum ether, 2:3) and 1H-NMR indicated that a substantial fraction of the starting material(Rf = 0.17) was converted to a single product (Rf =0.12). DMF was removed by co-evaporating with toluene under vacuum. The residue was dissolved in DCM and washed with water; the aqueous solution was extracted with DCM; the combined DCM solution was dried (MgSO4), filtered and concentrated. Flash chromatography of the residue (silica gel, AcOEt-petroleum ether, 2:3) allowed separation of the *idono*-azide 1,4-lactone **4** (0.54 g, 27%) and the gulono-azide **5** (1.35 g, 68%). m.p. 167-169C (AcOEt-petroleum ether). []D22 = +27.6 (c=1, CHCl3). {Lit.38 *ent-***5**: m.p. 166-168C (AcOEt-hexane). []D21 = -23.7 (c=0.35, CHCl3)}. MS (APCI+): *m/z* 214 ([M-N2+H)]+, 100%). IR (KBr): 3445 (OH), 2119 (N3), 1768 (C=O, lactone) cm-1. 1H-NMR (400 MHz, DMSO-d6):  1.29, 1.35, (2s, 23H, CMe2), 3.77 (dd, 1H, *J*6a,5 6.3, *J*6a,6b 8.7, H-6a), 4.06 (dd, 1H, *J*6b,5 6.7, *J*6b,6a 8.7, H-6b ), 4.26 (m, 1H, H-5), 4.37 (dd, 1H, *J* 3.0, *J* 8.6, H-4), 4.43 (d, 1H, *J*2,3 4.7, H-2), 4.51 (m, 1H, H-3), 6.34 (d, 1H, *J*OH,3 5.3, OH) ppm. 13C-NMR (100.6 MHz, DMSO-d6):  25.3, 26.6 (Me2C), 61.5 (C-2), 64.2 (C-6), 70.0 (C-3), 74.6 (C-5), 83.2 (C-4), 109.1 (Me2C), 172.0 (C-1) ppm. Found : C, 44.54; H, 5.39; N, 17.21%; C9H13N3O5 requires C, 44.68; H, 5.16; N, 17.08%.

2-Azido-2-deoxy-5,6-*O*-isopropylidene-D-gulitol **6**

A solution of LiBH4 in THF (2M, 3.25 ml, 6.05 mmol) was added dropwise to a solution of the azidolactone **5** (700 mg, 2.88 mmol) in THF (25 ml) at -35C under nitrogen. The reaction solution was stirred at -30C for 3h. TLC (AcOEt-meow, 8:1) indicated the conversion the starting material (R= = 0.69) to a major product (Rf = 0.45). Saturated NH4Cl (3 ml) was added dropwise to the reaction solution and the mixture was allowed to warm up to r.t., causing precipitation of white solids. The mixture was filtered through celite and washed with THF. The combined THF solution was evaporated and the residue was purified by flash chromatography (silica gel, AcOEt-meow, 9:1) to give unreacted starting material **5** (80 mg, 11%) and the triol **6** as a white gum (620 mg, 87%). []D22 = +188.5 (c=1.3, MeOH). MS (APCI+): *m/z* 220 ([M-N2+H)]+, 100%). IR (KBr): 3412 (OH), 2104 (N3) cm-1. 1H-NMR (400 MHz, CD3OD):  1.37, 1.43 (2s, 23H, CMe2), 3.32-3.36 (m, 1H, H-3), 3.60-3.65 (m, 1H, H-2), 3.69-3.74 (m, 3H, H-1a, H-4, H-6a), 3.99 (dd, 1H, *J* 2.9, *J* 11.4, H-1b), 4.04 (dd, 1H, *J* 6.5, *J* 8.3, H-6b), 4.25 (q, 1H, *J* 7.0, H-5) ppm. 13C-NMR (100.6 MHz, CD3OD):  26.2, 27.4 (Me2C), 63.8 (C-1), 66.0 (C-2), 67.3 (C-6), 72.0 (C-3), 73.0 (C-4), 79.4 (C-5), 111.0 (Me2C) ppm. Found : *m/z* 248.1246 ([M+H]+); C9H18N3O5 requires 248.1241.

2-Azido-2-deoxy-5,6-*O*-isopropylidene-1,3,4-tri(*O*-*tert*-butyldimethylsilyl)-D-gulitol **7**

*tert*-Butyldimethylsilyl triflate (1.43 ml, 6.2 mmol) was added dropwise through a syringe to a solution of the triol **6** (440 mg, 1.78 mmol) in pyridine (5 ml) and DCM (10 ml) at r.t. The solution was stirred at r.t. under nitrogen for 72h. TLC (AcOEt-Petroleum ether, 1:10) indicated the disappearance of the starting material (Rf = 0.00) and the formation of a major product (Rf = 0.81). Solvents were removed under vacuum and the residue was redissolved in AcOEt and water. The aqueous solution was extracted with AcOEt. The combined AcOEt solution was dried (MgSO4), filtered and concentrated. The residue was purified by flash chromatography (silica gel, AcOEt-petroleum ether, 1:15) to give the protected gulitol **7** as a colourless oil (910 mg, 88%). []D24 = -176.0 (c=1.0, DCM). MS (APCI+): *m/z* 562 ([M-N2+H)]+, 50%). IR (KBr): 2102 (N3) cm-1. 1H-NMR (400 MHz, CDCl3):  0.090, 0.094, 0.097, 0.103, 0.115, 0.118 (6s, 18H Me2SiCMe3), 0.91, 0.92, 0.93 (3s, 27H, Me2SiCMe3), 1.35, 1.40 (2s, 23H, CMe2), 3.60 (dd, 1H, *J* 3.7, *J* 6.9, H-4), 3.69-3.79 (m, 4H, H-1, H-3, H-6a), 3.86 (dd, 1H, *J* 1.5, *J* 8.9, H-2), 4.01 (dd, 1H, *J* 6.1, *J* 8.4, H-6b), 4.18 (q, 1H, *J* 7.4, H-5) ppm. 13C-NMR (100.6 MHz, CD3OD):  26.2, 27.4 (Me2C), 63.8 (C-1), 66.0 (C-2), 67.3 (C-6), 72.0 (C-3), 73.0 (C-4), 79.4 (C-5), 111.0 (Me2C) ppm. 13C-NMR (100.6 MHz, CDCl3):  -5.49, -5.40, -4.77, -4.74, -4.58, -4.45 (Me2SiCMe3), 18.0, 18.2, 18.3 (Me2SiCMe3), 25.6, 25.7, 25.8, 25.8, 26.7 (Me2SiCMe3, Me2C<), 64.0 (C-1), 66.3 (C-6), 66.6 (C-2), 74.6 (C-3), 75.8 (C-4), 76.3 (C-5), 108.3 (Me2C<) ppm. Found : *m/z* 612.3660 ([M+Na]+); C27H59N3O5NaSi3 requires 612.3663.

2-Azido-2-deoxy-3,4-bis(*O*-*tert*-butyldimethylsilyl)-D-gulitol **8**

The acetonide **7** (190 mg, 0.32 mmol) was dissolved in AcOH-H2O (4:1, 3 ml) and the solution was stirred at 70-74 C for 2.5h. TLC (AcOET -petroleum ether, 1:2) indicated the complete conversion of the starting material (Rf = 0.95) to a major product (Rf = 0.65). Solvents were removed by co-evaporating with toluene under vacuum. The resulting light brown oily residue was dissolved in AcOEt (2 ml), pre-absorbed on silica gel and purified by flash chromatography (silica gel, AcOEt-petroleum ether, 1:10 and then 1:3) to give the triol **8** (115 mg, 82%). m.p. 76-78C (AcOEt-petroleum ether). []D24 = +16.0 (c=0.05, MeOH). MS (APCI+): *m/z* 458 ([M+Na]+, 15%), 408 ([M-N2+H)]+, 20%). MS (APCI-): *m/z* 434 ([M-H]-, 100%). IR (KBr): 3339 (OH), 2090 (N3) cm-1. 1H-NMR (400 MHz, CD3OD):  0.13, 0.15, 0.16, 0.17 (4s, 12H Me2SiCMe3), 0.94, 0.99 (2s, 18H, Me2SiCMe3), 3.50 (d, 2H, *J*6,56.8, H-6), 3.57 (dd, 1H, *J*1a,28.4, *J*1a,1b 11.2, H-1a), 3.76 (dd, 1H, *J*4,34.9, *J*4,5 2.1, H-4), 3.80 (dt, 1H, *J*5,4 2.0, *J*5,6 6.6, H-5), 3.86 (dd, 1H, *J*3,2 3.3, *J*3,4 4.9, H-3), 4.01 (1H, ddd, *J*2,1a 8.6, *J*2,1b 2.7, *J*2,3 5.6, H-2), 4.07 (dd, 1H, *J*1b,22.7, *J*1b,1a 11.2, H-1b) ppm. 13C-NMR (100.6 MHz, CDCl3):  -4.12, -4.03, -3.85, -3.53 (Me2SiCMe3), 19.35, 19.47, (Me2SiCMe3), 26.73, 26.86 (Me2SiCMe3), 64.4 (C-1), 65.1 (C-6), 67.2 (C-2), 70.8 (C-5), 74.2 (C-4), 79.9 (C-3) ppm. Found : *m/z* 458.2482 ([M+Na]+); C18H41N3NaO5Si2 requires 458.2481.

2-Azido-2-deoxy-1,3,4,6-tetra(*O*-*tert*-butyldimethylsilyl)-D-gulitol **9**

*tert*-Butyldimethylsilyl chloride (128 mg, 0.85 mmol) was added to a solution of the *bis*-TBDMS ether **8** (74 mg, 0.17 mmol) in pyridine (5 ml) at r.t. The solution was stirred at r.t. under nitrogen for 18h. TLC (AcOEt-Petroleum ether, 1:15) indicated the disappearance of the starting material (Rf = 0.00) and the formation of a major product (Rf = 0.69). Pyridine was removed by co-evaporating with toluene. The residue was dissolved in DCM (1.5 ml), pre-absorbed on silica gel and purified by flash chromatography (silica gel, AcOEt-petroleum ether, 1:20), to afford the *tetra*-TBDMS ether **9** as a colourless oil (101 mg, 90%). []D24 = -213.6 (c=1.1, DCM). MS (APCI+): *m/z* 664 ([M+H]+, 55%), 636 ([M-N2+H)]+, 100%). MS (APCI-): *m/z* 662 ([M-H]-, 100%). IR (KBr): 3558 (OH), 2099 (N3) cm-1. 1H-NMR (400 MHz, CDCl3):  0.06, 0.08, 0.09, 0.12, 0.13, 0.16 (6s, 24H Me2SiCMe3), 0.89, 0.90, 0.92, 0.95 (4s, 36H, Me2SiCMe3), 3.40 (t, 1H, *J* 9.2, H-6a), 3.56 (dd, 1H, *J*6b,55.6, *J*6b,6a 9.5, H-6b), 3.68 (dd, 1H, *J*1a,1b 10.6, *J*1a,2 8.8, H-1a), 3.73 (dd, 1H, *J*3,2 8.9, *J*3,4 4.6, H-3), 3.76-3.84 (m, 1H, H-5), 3.83 (dd, 1H, *J*4,34.7, *J*4,5 1.0, H-4), 3.87-3.89 (m, 1H, H-2), 4.06 (dd, 1H, *J*1b,22.7, *J*1b,1a 11.6, H-1b) ppm. 13C-NMR (100.6 MHz, CDCl3):  -5.55, -5.45, -5.37, -4.96, -4.80, 4.53, -4.03 (Me2SiCMe3), 17.88, 18.05, 18.27, 18.39, (Me2SiCMe3), 25.75, 25.80, 25.86, 25.98 (Me2SiCMe3), 63.7 (C-6), 64.2 (C-1), 64.9 (C-2), 68.1 (C-5), 71.2 (C-4), 73.9 (C-3) ppm. Found : *m/z* 664.4393 ([M+H]+); C30H70N3O5Si4 requires 664.4409.

2-Azido-2-deoxy-5-*O*-mesyl-1,3,4,6-tetra(*O*-*tert*-butyldimethylsilyl)-D-gulitol **10**

Methanesulfonic chloride (81 mg, 0.712 mmol) was added dropwise through a micro-syringe to a solution of the secondary alcohol **9** (315 mg, 0.475 mmol) and DMAP (20 mg, cat.) in pyridine (2 ml) and DCM (10 ml) at 0C (ice-bath) under nitrogen. The reaction mixture was stirred for 16h. when TLC (AcOEt-petroleum ether, 1:20) indicated the complete conversion of the starting material (Rf = 0.62) to a single product (Rf = 0.50). Solvents were evaporated under vacuum. The resulting residue was re-dissolved in petroleum ether and purified by chromatography (silica gel, AcOEt-petroleum ether, 1:50), to produce the mesylate **10** as colourless oil (285 mg, 81%). []D24 = +4.0 (c=0.1, DCM). MS (APCI+): *m/z* 714 ([M-N2+H]+, 98%), 618 ([M-N2-MeSO3)]+, 100%). IR (KBr): 2108 (N3), 1472, 1361, 1258 cm-1. 1H-NMR (500 MHz, CD3CN):  0.12, 0.13, 0.15, 0.16, 0.17 (5s, 24H Me2SiCMe3), 0.94, 0.95, 0.96, 0.98 (4s, 36H, Me2SiCMe3), 3.12 (s, 3H, MeSO3), 3.79-3.86 (m, 3H, H-1a, H-4, H-6a), 3.87-3.92 (m, 2H, H-2, H-3), 3.97 (dd, 1H, *J* 2.3, *J* 10.4, H-1b), 4.15 (dd, 1H, *J* 4.1, *J* 11.2, H-6b), 4.86-4.89 (m, 1H, H-5) ppm. 13C-NMR (125.7 MHz, CD3CN):  -4.85, -4.62, -4.53 (Me2SiCMe3), 18.05, 18.15, 18.25, 18.45 (Me2SiCMe3), 25.63, 25.73, 25.92 (Me2SiCMe3), 39.13 (MeSO3), 62.9 (C-6), 64.5 (C-1), 67.2 (C-2), 72.1 (C-3), 73.3 (C-4), 82.8 (C-5) ppm. Found : *m/z* 742.4168 ([M+H]+); C31H72N3O7Si4S requires 742.4170.

2,5-Dideoxy-2,5-imino-1,3,4,6-tetra(*O*-*tert*-butyldimethylsilyl)-L-mannitol **11**

A mixture of sodium acetate (42 mg, 0.51 mmol), palladium on carbon (10%, 100 mg) and the azidomesylate **10** (250 mg, 0.34 mmol) in ethyl acetate (25 ml) was hydrogenated under an atmospheric pressure for 18h. TLC (AcOEt-petroleum ether , 1:8) indicated the disappearance of the starting material (Rf = 0.63) and the formation of a single product (Rf =0.45). The reaction mixture was filtered through celite, washed with AcOEt. The combined AcOEt solution was concentrated; the colourless oily residue was dissolved in petroleum ether and purified by chromatography (silica gel, AcOEt-petroleum ether, 1:20),to give the protected pyrrolidine **2** as viscous white semi-solids 179 mg, 85%). []D24 = -6.4 (c=0.7, DCM). MS (APCI+): *m/z* 620 ([M+H]+, 100%). IR (KBr): 3400 (NH) cm-1. 1H-NMR (400 MHz, CDCl3):  0.10, 0.12, 0.13 (3s, 24H Me2SiCMe3), 0.93, 0.94 (2s, 36H, Me2SiCMe3), 3.05-3.10 (m, 2H, H-2, H-5), 3.55, 3.64 (2dd, 22H, *J* 9.8, *J* 7.3, H-1, H-6), 4.00 (m, 2H, H-3, H-4) ppm. 13C-NMR (50.3 MHz, CDCl3):  -5.40, -4.65, -4.54, (Me2SiCMe3), 18.00, 18.30, (Me2SiCMe3), 25.8, 25.9 (Me2SiCMe3), 64.1 (C-1, C-6), 68.0 (C-2, C-5), 81.5 (C-3, C-4) ppm. Found: *m/z* 620.4382 ([M+H]+); C30H70NO4Si4 requires 620.4378.

2,5-Dideoxy-2,5-imino-L-mannitol (L-DMDP) **2**

The protected L-DMDP **11** (150 mg, 0.242 mmol) was dissolved in a solution of HCl in MeOH (2M, 12 ml) and the reaction mixture was stirred at r.t. for 17h. TLC (AcOEt-petroleum ether , 1:8) indicated the disappearance of the starting material (Rf = 0.45) and the formation of a single product (Rf =0.00). The solution was then bubbled with nitrogen, concentrated, neutralised with 2M NH4OH, and concentrated again. The residue was purified by acidic ion-exchanger resin (Dowex 508-400, hydrogen form, column size: 1.214 cm), eluting with distilled water (50 ml) and then 1M NH4OH (50 ml). 2,5-dideoxy-2,5-imino-L-mannitol (L-DMDP) was obtained as white solids (35 mg, 90%). m.p. 116-117C (MeOH). []D23 = -52.7 (c=0.28, H2O). {Lit37: []D23 = -54.3 (c=0.3, H2O). Lit45,46 m.p. 116-118C (EtOH). []D20 = +53.8 (c=0.32, H2O)}. MS (APCI+): *m/z* 164 ([M+H]+, 100%). IR (KBr): 3400 (NH) cm-1. 1H-NMR (500 MHz, D2O, reference to TSS, pH=8.8):  3.06 (m, 2H, H-2, H-5), 3.65, 3.74 (2dd, 22H, *J* 11.6, *J* 6.4, H-1, H-6), 3.86 (m, 2H, H-3, H-4) ppm. 13C-NMR (125.7 MHz,D2O):  64.6 (C-1, C-6), 64.9 (C-2, C-5), 80.8 (C-3, C-4) ppm. Found : *m/z* 164.0923 ([M+H]+); C6H14NO4 requires 164.0924.
